# Supplementary material
Source: publisher site journal article supplement (https://www.dovepress.com/article/368836)
Supplement: Supplementary file 1 [file get_supplementary_file.php]

Supplementary table 1: Role of diosgenin in disease models related to atherosclerosis

| Process involved in AS | Model | Species /cell line used | Induction conditions | Dose and duration | Mechanisms and Effects | References |
| --- | --- | --- | --- | --- | --- | --- |
| Endothelial dysfunction（vascular tone）, inflammation, lipid metabolism | Atherosclerosis | Wistar rats | Atherogenic diet | 80 mg/kg b∙w/day  for 15 weeks | NFκBp65↓, COX-2↓, TNFα↓, MCP-1↓  LDL↓, TL↓, VLDL↓, TG↓, TC↓  iNOS↓, NO↓ | 39 |
| Endothelial dysfunction（vascular tone, inflammation | Obesity/hyperlipidemia | SD rats,  3T3- L1cells | Palmitic acid | Rats:20, 40 mg/kg for 8 weeks; Cells:0.1-10µM for 48h | AMPK↑→TNF-α↓, IL-6↓, MCP-1↓,  adipocyte factor↓, adiponectin↑, PPARγ↑, iNOS↓, eNOS↓ | 40 |
| Endothelial dysfunction（vascular tone, oxidative stress）, lipid metabolism | Chronic renal failure | Albino Wistar rats | Adenine | 40 mg/kg b.w/day  for 5 weeks | eNOS↑, GSH↑  HMG-CoA reductase activity↓, LCAT↑→TC↓, LDL-C↓, VLDL-C↓, TG↓, HDL-C↑ | 52 |
| Endothelial dysfunction（vascular tone, thrombosis）inflammation | Endothelial dysfunction model and aortic contractile model | HUVECs, SD rats | Palmitic acid, insulin | Rats：0.1, 1, and 10 µmol/L for 30 min | PAI-1↓, ET-1↓  IKKβ/NF-κB↓→TNF-α↓, IL-6↓, IRS-1  serine phosphorylation↓  Akt/eNOS↑→NO↑ | 41 |
| Endothelial dysfunction（vascular tone，oxidative stress ） | Early-Stage Metabolic Syndrome, a model of endothelium-dependent vasorelaxation | Wistar rats | High-fat, high-sugar diet | 1, 10 and 50 mg/kg b.w/day for 6 weeks | GSH↓, GSSG↓, glutathione reductase↓, NO↑ | 38 |
| Thrombosis | Inflammation model | THP-1 cells | TNF-α | 0.01, 0.1, and 1 μmol/L for 2 h or 5 h | NF-κB↓, Akt↓, MAPK↓→IKKβ↓, TF↓ | 143 |
| Thrombosis | arterial and venous thrombosis models | SD rats, BALB/c mice | FeCl3, ADP | Rats:20,46,64mg/kg, twice daily for 7 days  Mice:575.5 mg/kg for 7 days | Platelet aggregation↓, factor VIII a↓, APTT↑, PT↑, TT↑ | 24 |
| Thrombosis | Inferior vena cava ligation thrombosis rat model and pulmonary thrombosis mice model | Kunming mice, SD rats | ADP, inferior vena cava ligation, a mixture solution of collagen (114 g/mouse) and epinephrine (1.83g/mouse) | Rats: 23.0, 46.0 and 92.0 mg/kg, respectively  Mice: 33.1, 66.2 and 132.4 mg/kg, respectively. | APTT↑, TT↑, PT↑, platelet aggregation↓, coagulation and bleeding time↑, clot lysis↑ | 67 |
| Proliferation and migration of VSMCs | Contraction in the Isolated Mouse Aorta | primary mouse aortic SMCs from C57BL/6 mice | Phenylephrine | 1,5,10,25,50umol/L for 24h | Proliferation and migration of VSMCs↓, caspase-3↑→aortic contraction↓ | 71 |
| Oxidative stress, vascular calcification | Chronic renal failure | Wistar rats | Adenine | 10,20,40 mg/kg b.w/day for 5 weeks | CAT↑, SOD↑, GPX↑, ALP↑, TBARS↓, LOOH↓, NO↑, phenotype transformation of VSMCs↓ | 51 |
| Oxidative stress, vascular calcification | Chronic renal failure | Wistar rats | Adenine | 40 mg/kg b.w day for 5 weeks | eNOS↑, NO↑  Pit-1↓, ALP↓,collagen type 1↓→phenotype transformation of VSMCs↓ | 37 |
| Lipid metabolism (cholesterol excretion） | Abcg8+/+, Abcg8+/-and Abcg8-/-model | Male FVB mice and female  Abcg8+/+, Abcg8+/-, and Abcg8-/- (C57Bl/6×129Sv) mice | - | 1.0% (wt/wt) diosgenin for 18 days | ABCG5/8↑→biliary cholesterol secretion↑ | 127 |
| Lipid metabolism (cholesterol excretion） | Cholestasis model | Wistar rats | Ethinyl estradiol | Diosgenin in diet [1% (w/w)] for 7 days. | ABCG5/8↑→biliary cholesterol secretion↑ | 128 |
| Lipid metabolism (cholesterol excretion） | NPC1L1-knockout (L1KO) mice | WT and L1KO  mice with a pure C57BL/6 background | - | Diet with 1% (w/w) diosgenin for 14 d. | Biliary cholesterol synthesis↑, fecal cholesterol excretion↑ | 107 |
| Lipid metabolism (cholesterol excretion） | the rat liver subjected to obstructive cholestasis | SD rats | E17G or 17 a -ethynylestradiol | Diosgenin in diet [1%(wt/wt)] for 6 days | Biliary cholesterol secretion↑, cholestasis↓ | 122 |
| Lipid metabolism (cholesterol absorption and excretion) | Hyperlipidemia | Albino wistar rats | High fat diet | 0.15,0.3 g/kg/d for 4 weeks | LXR-α↓→ABCG5/8↑, cholesterol excretion↑  NPC1L1↓, →cholesterol absorption↓, TC↓, TG↓, LDL-C↓, FTC↓, TTC↓ | 85 |
| Lipid metabolism (cholesterol excretion） | hypercholesterolemia | SD rats | High-fat diet | 150,300 mg/kg/d for 8 weeks | SRB1/CES-1/CYP7A1/FXR↑→cholesterol absorption↓, cholesterol excretion↑ | 129 |
| Lipid metabolism (cholesterol excretion） | Hyperlipidemia | albino rats (Charles River) | High fat diet | 1% diosgenin for 1 week | HMG-CoA reductase↑  cholestatic cholesterol↑ | 15 |
| Lipid metabolism (cholesterol excretion） | Hypercholesterolemia | albino rats (Wistar) | Hypercholesterolemic diet | 5% diosgenin for 40 days | The output of bile acids from hepatocytes↑, fecal excretion of neutral sterols↑  CE↓, TG↓ | 109 |
| Lipid metabolism (cholesterol absorption) | Hypercholesterolemia | SD rats | High cholesterol diet | 1% diosgenin supplementation for 6 weeks | The intestinal surface area↓→cholesterol absorption↓, serum lipase↑, cholesterol↑ | 106 |
| Lipid metabolism | hypertriacylglycerolemia | KK-Ay mice | High-fat diet | 500 ppm for 8 weeks | PGC1α/LPL↑, PPARα↓, →TG↓ | 80 |
| Lipid metabolism | Obesity/non-alcoholic fatty liver disease | C57BL/6J mice | High-fat diet | 80 mg/kg b.w./day for 6 weeks | SREBP-1c↓, FASN↓, TG↓, TC↓ | 92 |
| Lipid metabolism | an obese diabetic model | HepG2 cells | High-fat diet | 1–10mmol/L | LXRα/SREBP-1c↓→FAS↓, SCD1↓, ACC↓, GPAT↓→TG↓ | 94 |
| Lipid metabolism, oxidative stress | Obesity/non-alcoholic fatty liver disease | LO2 cells | Palmitic acid | 10−7mol/L,  10−6mol/L and 10−5mol/L for 24h | AMPK/ACC/CPT-1A↑, SREBP-1c/FAS↓, TG↓，GSH-PX↑, CAT↑, SOD↑, ROS↓, MDA↓ | 93 |
| Lipid metabolism, oxidative stress | Hyperlipidemia | SD rats, HUVECs | High-fat diet, H2O2 | Rats:22.1,44.2,88.4 mg/kg/d for 6 weeks  HUVECs:20,50,100umol/L for 1h | GSH-PX↑, MDA↓, NOS↑, SOD↑  LPL↑, HL↑, TC↓, TG↓, LDL-C↓,  Apoptosis↓ | 49 |
| Lipid metabolism, oxidative stress | Hyperlipidemia | SD rats | High -cholesterol diet | 0.1%,0.5% diosgenin for 6 weeks | TC↓, HDL-C↑, TBARS↓, CAT↓, GSH-Px↓, Mn-SOD↓, Cu/Zn-SOD↓ | 53 |
| Plaques (foam cells) formation | Atherosclerosis | THP-1 cells, albino Wistar rats, | Atherogenic diet, OxyLDL | Rats:80 mg/kg b.w/day for 15 weeks  cells:0, 2, 4, 6, 8, 10, 12, 14, 16, 18, and 20 µM for 24/48h | Notch↓→TC↓, TG↓, LDL↓, VLDL↓ →foam cells↓ | 135 |
| Plaques (foam cells) formation | Atherosclerosis | THP-1 cells,  MPMs from adult C57BL/6J mice | acLDL, western diet | Mice:1% Diosgenin (w/w) for 8 weeks  Cells:40 µM for 24h | MiR-19b↓→ABCA1↑→RCT↑ | 116 |
| Plaque formation (polarization of macrophages), inflammation | Atherosclerosis | THP-1 cells, albino Wistar rats, | Atherogenic diet,  OxyLDL | Cells:14μM for 24/48h Rats:80 mg/kg b.wt/day  for 15 weeks. | NFκBp65↓, COX 2↓, MCP-1↓, TNF-α↓, IL-6↓, CD36↓, CD68↓, polarization of M2 macrophages↑ | 61 |
| Inflammation | Inflammation | HAECs | TNF-α | 100 nM for 30min | TNFR1↑ | 62 |
| Inflammation (leukocyte adhesion) | Atherosclerotic inflammatory model | The VSMC line MOVAS-1, THP-1 cells | TNF-α | 0.1–10μM for 2h | MAPK/Akt/NF-κB↓→VCAM-1↓, ICAM-1↓ROS↓ | 140 |
| Inflammation, oxidative stress | Atherosclerotic inflammatory model | peritoneal macrophage of C57BL/6 mice, Raw264.7 | LPS, IFN-γ | 0.1–10μΜ for 2h | NF-κB↓, JNK↓, CK2↓, AP-1↓→IL-1β↓, IL-6↓, TNF-α↓  iNOS↓, ROS↓ | 137 |

Supplementary table 2: Role of dioscin in disease models related to atherosclerosis

| Process involved in AS | Model | Species /cell line used | Induction conditions | Dose and duration | Mechanisms and Effects | References |
| --- | --- | --- | --- | --- | --- | --- |
| Lipid metabolism, endothelial dysfunction | postmenopausal atherosclerosis | LDLR-/- mice on a C57BL/6 J background, HAECs | High fat diet, ox-LDL, oophorectomy | Mice:35 mg/kg for 16 weeks  HAECs :0.3, 0.6 and 1.2μg/  mL for 24h | PGC-1α/ERα↑→TC↓, TG↓,  LDL-C↓, HDL-C↑  SOD↑, GSH↑, MDA↓, ROS↓,  NOX4↓，ICAM-1↓, VCAM-1↓, MCP-1↓，capase-3↓, caspase-9↓, Bcl-2↓, autophagy↑ | 81 |
| Proliferation and migration of VSMCs | Intimal hyperplasia model | SD rats, HUVECs | Carotid artery balloon injury  model FBS or PDGF | Rats:40,80 mg/kg for 16 days  HUVECs:1.25-5mg/L for 24h | ERK1/2↓, MAPK-FoxM1↓→phenotype transformation of VSMCs↓, proliferation and migration of VSMCs↓ | 72 |
| Lipid metabolism | Nonalcoholic fatty liver disease | primary cultured hepatocytes, AML-12 cells, HepG-2 cells, Wistar rats, C57BL/6J mice | Palmitic acid, high-fat diet | primary cultured hepatocytes:125, 250, 500, 1000, 2000,4000 ng/mL for 24h; AML-12:75, 150, 300, 600, 1200,2400 ng/mL for 24h; HepG-2:100, 200, 400, 800, 1600,3200 ng/mL for 24h; Mice:20,40,80 mg/kg for 8 weeks  Rats:15,30,60 mg/kg for 8 weeks | SIRT1/AMPK↓ →SREBP-1c↓, FAS↓, CPT↓, FoxO1↓, ATGL↓, SCD↓, FC↓, TC↓  GSH↑, SOD↑ | 90 |
| Lipid metabolism | Obesity | 3T3-L1 preadipocytes, C57BL/6J mice | High-fat diet | 3T3-L1:0-4 µM for 6 days; mice:50 mg/kg for 4 weeks | AMPK/MAPK↑→PPARγ↓, SREBP-1c↓, C/EBPα/β/δ↓, GLUT4↓ | 95 |
| Lipid metabolism | metabolic glycolipid metabolic disorder in type-2-diabetes | HepG2 cells, AML12 cells, Wistar rats, and spontaneous T2DM KK-Ay mice | Insulin, palmitic acid, high-fat diet, streptozotocin | Cells:50, 100 and  200 nM for 24 h  Rats:15,30,60 mg/kg for 4 weeks  Mice:20,40,80 mg/kg for 8 weeks | miR-125a5p/STAT3↑→PI3K↑, AKT↑, foxO1↑,  GSK-3β phosphorylation↑, SREBP-1c↓, PEPCK↓, G6Pase↓, FAS↓, CSD1↓, ACC↓, TG↓ | 89 |
| Lipid metabolism, inflammation, oxidative stress | Non-alcoholic fatty liver disease, obesity | C57BL/6J mice and ob/ob mice | High-fat diet | 80 mg/kg for 10 weeks | LXRα↓, FAS↓, ACC1↓, SCD1↓, SREBP-1c↓， TC↓, TG↓, FFA↓,SOD↑,HO-1↑,GSS ↑,Nrf2↑  autophagy↑,0NF-κB↓, COX-2↓, CYP2E1↓, HMGB1↓, AP-1↓ | 91 |
| Lipid metabolism (foam cell formation), inflammation | Atherosclerosis | Dendritic cells | High glucose | 30 mM for 24 h | p38 MAPK↓→SR-A↓, CD36↓, LOX-1↓, IL-6↓, IL-12↓, ROS↓ | 113 |
| Lipid metabolism, inflammation, oxidative stress | Renal damage | SD rats | Fructose | 15, 30, 60 mg/kg for 8 weeks | SIRT3↑→NF-κB↓, IL-1β↓, IL-6↓, TNF-α↓, GST↑ SOD2↑, Nrf2↑  Akt/FoxO↑→ SREBP-1C↓, FASN↓, ACC↓, SCD1↓ | 58 |
| Lipid metabolism (foam cell formation), inflammation | Atherosclerosis | SD rats, peritoneal macrophages | Vitamin D3, ox-LDL | Rats:25,50,100mg/kg/d for 28days  Cells: 1–4 μM for 48 h | NFκB↓→TNF-α↓, IL-1β↓, IL-6↓  LOX-1↓→ox-LDL↓, foam cell formation↓ | 83 |
| Inflammation, (leukocyte adhesion) | Inflammation | fresh PBMCs, HUVECs | TNF-α | 1.2 or 0.3ug/ml for 24h | NF-κB↓→EL↓, VCAM-1↓, ICAM-1↓ | 60 |
| Inflammation | systemic inflammatory response syndromevia | THP‑1 cells, C57BL/6J mice, SD rats | LPS, zymosan | Cells: 57.5, 115, 230, nM for 24h; Rats: 60,30,15 mg/kg for 7 days; mice: 80, 40 and 20 mg/kg for 7 days | TLR2/MyD88/ NF-κB↓→IL-1β↓, IL-6↓, TNF-α↓  SOD↑, MDA↓ | 136 |

Supplementary table 3: Role of other analogs in disease models related to atherosclerosis

| Compound | Process involved in AS | Model | Species /cell line used | Induction conditions |  | Mechanisms and Effects | References |
| --- | --- | --- | --- | --- | --- | --- | --- |
| pseudoprotodioscin | Endothelial dysfunction, inflammation | Atherosclerosis | HUVECs, apoE-/- C57BL/6J mice | LPS, ox-LDL, high-cholesterol diet. | Mice:1, 2.5,5 mg/kg for 8 weeks; HUVECs: 0–20 μM for 36 h; | ERα/NO/NFκB→MCP-1↓, ICAM-1↓  TNF α↓ | 42 |
| pseudoprotodioscin | Proliferation and migration of VSMCs | A rat carotid artery balloon injury model | A7r5 cells (#60082), male rats | Rat carotid artery balloon injury, FBS | Cells:3, 6, 9 μM for 24h  Rats:6 μM for 2 weeks | DAM15↓, FAK↓, ERK↓, PI3K/Akt↓, MMP-2/-9↓ | 73 |
| yamogenin | Lipid metabolism | Nonalcoholic fatty liver disease | HepG2 cells | T0901317 | 1,2,5,20μM for 24h or 48h | LXR↓, SREBP-1c↓→FAS↓,  SCD-1↓, ACC↓, TG↓ | 101 |
| protodioscin | Lipid metabolism, clotting | Hyperlipidemia | SD rats | High-fat diet | 0.5 mg/kg for 3 weeks | TG↓, TC↓, LDL-C↓, HDL-C↑  clotting time↓ | 172 |
| protodioscin | Lipid metabolism | The model of in vitro intestinal digestion | - | - | 0.47mg/mL | PL↓, cholesterol↓ | 86 |
| pseudoprotodioscin | Lipid metabolism | An in vivo estrogen-deficient mouse model | apoE-/- C57BL/6J mice | Bilateral ovariectomy | 0.5 mg/kg or 12 weeks | TC↓ | 98 |
| pseudoprotodioscin, protodioscin, Methylprotodioscin | Lipid metabolism RCT | Hyperlipidemia | The human HepG2 cells, THP-1 monocytic cells | acLDL | 25,50 µM for 24 or 48h | MicroRNA33a/b↓, →ABCA1↑，SREBP1c↓, SREBP2↓  PCSK9↓, → LDLR ↑ACC↓, FAS↓, HMGCR↓ | 96,97 |
| Tomatidine | Lipid metabolism | Nonalcoholic fatty liver | C57BL/6 mice, FL83B mouse hepatocyte cells | High-fat diet, oleic acid | 5 or 10 mg/kg for 4 weeks | sirt1/AMPK↑, adiponectin↑, HDL↑  SREBP-1c↓, TC↓, TG↓, fasting blood-glucose↓, ox-LDL↓ | 64 |
| Tomatidine | Lipid metabolism | Atherosclerosis | HMDMs, apoE deficient mice (C57BL/6.KOR-Apoeshl) | High-fat and high-cholesterol, diet, acLDL | HMDMs:30 μM for 24 h  Mice:50 mg/kg for 70 days. | ACAT-1/-2 activity↓, CE↓, TC↓, LDL↓ | 105，178 |
| Tomatidine | Inflammation | Inflammation | RAW 264.7 cells | LPS | 10，20，40μM for 24 h | NF-κB↓, JNK↓, iNOS↓, COX-2↓, PGE 2↓ | 139 |
